# Supplementary material for: Reduction of Tumor Growth with RNA-Targeting Treatment of the NAB2–STAT6 Fusion Transcript in Solitary Fibrous Tumor Models
Source: MDPI journal article supplement (doi:10.3390/cancers15123127), 2023-06-09
Supplement: s1 [file s1]

## Supplementary materials

### General cloning protocols

The Q5 High-Fidelity 2X Master Mix (New England Biolabs, catalog number: M0492) was used for all polymerase chain reactions (PCR) according to the manufacturer's protocol. All oligonucleotides were ordered from Sigma-Aldrich and were listed in **Supplementary Table S1**. The plasmids were constructed using PCR amplification, restriction digest (all restriction enzymes were ordered from New England Biolabs), and ligation with T4 DNA ligase (New England Biolabs, catalog number: M0202). Gel purification and PCR purification were performed with QIAquick Gel Extraction kit (Qiagen, catalog number: 28707) and PCR Purification kit (Qiagen, catalog number: 28104). Transformations were performed using NEB 5-alpha electrocompetent *Escherichia Coli* cells (New England Biolabs, catalog number: C2987). The minipreps were performed using QIAprep Spin Miniprep kit (Qiagen, catalog number: 27106). The final plasmids were confirmed by both restriction enzyme digestions and direct Sanger sequencings.

### DNA constructs

**PCMV-spCas9-U6-sgRNA.left:** The U6-sgRNA.left sequence was first PCR amplified from PCMV-spCas9-U6-sgRNA.PUF (unpublished results) using primers P7 and P8, and the PCR product was subsequently subjected to the second round PCR using primers P7 and P9. The PCR product was then cloned into the PCMV-spCas9-U6-sgRNA.PUF vector using KpnI and XbaI sites.

**PCMV-spCas9-U6-sgRNA.right:** The U6-sgRNA.right sequence was first PCR amplified from PCMV-spCas9-U6-sgRNA.PUF (unpublished results) using primers P7 and P10, and the PCR product was subsequently subjected to the second round PCR using primers P7 and P9. The PCR product was then cloned into the PCMV-spCas9-U6-sgRNA.PUF vector using KpnI and XbaI sites.

**Homologous Recombination (HR) repair template:** The NAB2-STAT6 left homologous arm was PCR amplified using HCT116 genomic DNA as the template and primers P11 and P12. The PCR product was then cloned into the PGK1-Hygromycin resistance gene vector (unpublished results) using ClaI and FseI sites. The resulting plasmid was named Step1. Next, the NAB2-STAT6 right homologous arm was PCR amplified using HCT116 genomic DNA as the template and primers P13 and P14. The PCR product was then cloned into the Step1 plasmid using NotI and MscI sites. The resulting plasmid was named Step2. Next, to add new restriction enzyme sites for later knock-in sequences, a PCR reaction was performed using Step2 plasmid as the template and primers P15 and P16. The PCR product was then cloned into Step2 plasmid using ClaI and FseI sites. The resulting plasmid was named Step3. Next, one portion of the knock-in sequence was PCR amplified using HCT116 genomic DNA as the template and primers P17 and P18. The PCR product was then cloned into Step3 plasmid using XhoI and SmaI sites. The resulting plasmid was named Step4. Next, another portion of the knock-in sequence was PCR amplified using HCT116 genomic DNA as the template and primers P19 and P20. The PCR product was then cloned into Step4 plasmid using FseI and SmaI sites. The resulting plasmid was named Step5. Finally, the last portion of the knock-in sequence was synthesized at Genewiz and cloned into Step5 plasmid using MluI and XhoI sites.

**PCMV-CasRx-U6-sgRNA.NAB2STAT6:** The GFAP-CasRx-U6-sgRNA was ordered from Addgene (catalog number: 154001). The CMV promoter sequence was PCR amplified from D1 (unpublished results) using primers P27 and P28. The PCR product was then cloned into GFAP-CasRx-U6-sgRNA using XbaI and SgrAI sites. The resulting plasmid was named NS4.1.1. Next, the U6-sgRNA.NAB2STAT6 sequence was first PCR amplified from NS4.1.1 using primers P29 and P30, and the PCR product was subsequently subjected to the second round PCR using primers P2 and P31. The PCR product was then cloned into NS4.1.1 vector using BglII and EcoRI sites.

**PCMV-ATG-target.NAB2STAT6-YFP-PEST:** The target.NAB2STAT6-YFP-PEST was PCR amplified from B12 (unpublished results) using primers P32 and P33. The PCR product was then cloned into B12 using NheI and XmnI sites.

**PCMV-CasRx-U6-sgRNA.AAVS1:** The U6-sgRNA.AAVS1 sequence was PCR amplified from NS4.1.1 using primers P29 and P34, and the PCR product was subsequently subjected to the second round PCR using primers P2 and P35. The PCR product was then cloned into NS4.1.1 vector using BglII and EcoRI sites.

**Homologous Recombination (HR) repair template sequence:**

TCGACATCGATGCCAGCCCATGGGCTATGGAGCCGACACATCCTGCAGCAGACACTGATGGACGAGGGGCTGCG  
GCTCGCCCGCCTCGTCTCCACGACCGCGTGGGCCGCTCAGCCCCTGTGTGCCTGCGAAGCCACCTCTCGCAGGT  
GAGGCAGCCAGCAGTGCTGTCCCCAAGCACCCCGGCCACTCAGGCCCCACACAGCAATTCTGGTGTCTGGGGCC  
AGGTGGGAGGAAGAGGGATATAGTCGTAGAGAGGGCAGTAGGATGGCTGGGCTCCAGCCAGCCAGGCCTTGG  
GGTGAGAGAGGAGACCCCTGCCGAGCTGCTCCACCATGGAAAGTCTGGTCTAGTGTAGATCTGTGAAAGGG  
GAACTGGGGAATGGGGGGACAGAGAAAAGAGGATGAAGGAGCAGGAAGGAGGAGCATCAATAAGGGAAGCTC  
AGATGGCACTTCCACCAACCCAGGAGTGGGGAGCAGGCTAGGAGTTGTGGGTATGGGGATGGGGATGCCAGCT  
TGGAAGCAGAGGAGCCCAAAGCAGTGATGCTTTGTGTGTGGAAGGGGGAAGAGGGAGTGGGCAGGCGGAGGG  
CCGGGCAGCCGCTGGGCTGAGAGTGACGCAGCAGACAAAGCCACCAACCCTGGCTTGGTATTTTAAACTGTGCG  
TGGGTGGGAAGTGGGGGCGGGGACTGGAAGGGGGGCTCTTCTGAGGGAGGAGCTCGGAGGCTGGCTTCTGT  
TCTCCCTCTGATTTGGCTACCAAAAACTTGGGGGGCCATGGTAGAGTGGCCTGGGAGGGGCTGGGAGGGGGC  
CAGGGATGAGTGGGGGTGGCAGAGCTTGGGAAGGGGGGAGGGGAGAGGTGAGAGCCAAACCACCCCGCAGC  
TCCTGACAGAACCAGAAATTCAGCGCACGCGTATTGGGATCAGTACACGCGTTCTGATTGGTTCCTGTACCCAC  
TTCCTCCCTGCTCCCCGCTGCCCTCCTCTCCCTGCCCCGCGTGTATCCTGATGTCACTCCCTATTTCATAGCTGTGCTT  
CTCTTACTTCCCCATGATCCATGCCACCTTTTCCACCTCCCTTCTCCCTAACCCAGAGCACTCCATGGCTGTCTTT  
TCCTTCTCACAACAGCTGAACAGATGGGTAAGGATGGCAGGGGTTATGTCCCAGCTACCATCAAGATGACCGTGG  
AAAGGTGAGTGTGGTGGTATGGACAGTGGGTAGGTCAGGGGCTTAGTGCTTATCTGCAGGAAGGAGGGGTGGC  
ATCAACCCTTGGTCAGTCACATGTACCTCCTTCCCTCCTCCAGGGACCAACCACTTCTACCCAGAGCTCCAGATG  
CCTACCATGGTGCCTTCTTATGACCTTGAATGGCCCCTGATTCTCCATGAGCATGCAGCTTGGCCAGATATGGT  
GTAAGGAGCTGGAAAGACAGGAATGGGAGTGGTCTGTGCAGATGGGCTAATCTTAGCATGGGCAGCTGGGAGA  
GCTGGCACTGGGGGCTGAACAGGGAATCTTCTTTCCATGAGAGGGACACCTGTTCAAAGCAGGGGTGTGGTGG  
TGTCAGGAGAAGGGCTGGCATCAGGGGGTCTGTTTTCTTTCCCGAGGCCCCAGGTGTACCCACCACACTCTCACT  
CCATCCCCCGTATCAAGGCCTCTCCCCAGAAGAATCAGTCAACGTGTTGTGAGCCTTCCAGGAGTAAGTGAAAAA  
CCTCATGGGGATACCATCCCACTCTAAGGGGGTGGGCATTTGAATTGTTAGAAGAGGCTCTTCTGTGAGAAAGGA  
GCAGCAAATGCTAACAGCCTGTCTTCTTCTTCTGTCCACTCTAATGAGGGGGTAGTAGTTAAGATCTGGACTGCC  
TAGGTTTGAATTCTAGCTCCACCACTTACTGTTTTGGGGCAAATTACTTAGCCTTTGGTGCCTTATCTGCACAATGG  
GGGATAATAATGCTAATAATAAACCTACCTCACTGCATTATTGTGGAGATTAAATGAGTTCATAACACTTAAAAA  
GCTGAGCATAGTGCATGGCTCATAGCAAAAGCTGTGTAAGTCCAGTCGTGGATCACTTAATGAAGGAGCATTCTT  
GTCTTTGGCAGTTTCATAATTATGCGAATACCATTGAGTATAATTACACAAACCTAGATGGTATAGACTACTATACA  
CTGAGGCTATATTGTGTAGCCTATTGATCCTAGCTTTAAACCCGAGCAGCATGATACTGTTCTGAATAGTATAAGG  
AAATAGTAACATAATGGTAAATATTTGTGTATAGGAATTTTCACTTGATTATAATTTTTTTTTTTTGGAGACAGGG  
TCTCACTCACTGGAGTGCACTGGTGCGATCTTAGCTCCCTGCAACCTCCGCCTCTTGGGCTCGAGCAATCCTCTGCG  
TGATGTGACCACGACACTCGGCTAATCTTTTTTAAAGATTTTTCTGCAGACAAGGTCTCACTTACTGCCCAAGCTG  
GTCTCAAACCTCTGGGCTTAAGTGATCCTCCACCTCGGCCTCCCAAAGCGTTAGGATTACAGGCGTGAGTCACTC  
TGCCTGGCCTTGATTATAATCTTATGGGACCACTGTGGTCTGTAGTTGACAGAAATGTCGTTAATGTGGTGCATGA  
CTGTTATTATTATTTTCTGTCTGCCCTGAGAGCCACTGTCACTTCTCTGCTGTATTGGTTTTTTTACTCATCTGT  
TTTGGCCTTGAAATGGCCTAGACATTTTTCTTCCCGAAGTATGACACTCGGGTGCTTATTAACCTAGTCAAGACACA  
ACATCTCCCTTCCCAGAAGGTGAGGCGGGAGTGAGGACTTGGGGACTTAAGAACTACCAAAGTTCAGAGTCCAAA  
GAAACATTAGAAATTGGCTAATCCACCCCATACACGCACATTTTACAGATGAGAAGACTGAGCTCAGAGCATAG  
AAATAGCTTGCCAGGCCATGACTAAGTCAGGATAAGGAGCTGGAGCTTGTTCCTCACTCAGTGGTCTGACTTT  
GCACCACTCTGCATTTGCCTAGCCTGCCTTCTCTAACTGTGCTCTCCCTACTTCCAGGCCTCACCTGCAGATGCCCC  
CCAGCCTGGGCCAGATGAGCCTGCCCTTGACCAGCCTCACCCCACTGAGTGACAAAGCCCCTCTGACCCCATG  
TGCCTCTTCTTCTGGCCTTGCCCCGCTCTCCTATTTCCATTGCTGGTTCCTGGCAGGGGCTGCTGCCGTGCCAG  
CCTCAGGAGCATGCTGTGTCCAGCCCTGACCCCTGCTCTGCTCAGATGTGACCATGGTGGAAAGACAGCTGCCTGA  
GCCAGCCAGTGACAGCGTTTCTCAGGGCACTTGGTGAGTGGCAGCTTGGGAGTGGAGGCTGGGTGGCATCTAG  
GGGAGTGGGCGCCATGCCTACTCCACTGCTTCTCCATCTCCTTGAGGATTGGTGAAGACATATCCCTCCTCTGCG  
TGCCTCCCACTGAACAGGACCTCACTAAGCTTCTCTGGAGGGGCAAGGGGAGTCGGGGGGAGGGTCTTGGGG

GCACAGCCCCTCCTGCAGCCCTCCCACTATGGGCAATCTGGGATCTCAATGTCCCACATGGACCTAAGGGCCAACC  
CCAGTTGGTGATCCCAGCTGGAGGGAGAACCCAAAGAGACAGCTCTTCTACTACCCCCACAGACCTGCTCTGGAC  
ACTTGCTCATGCCCTGCCAAGCAGCAGATGGGGAGGGTGCCCTCCTATCCCCACCTACTCCTGGGTCAGGAGGAA  
AAGACTAACAGGAGAATGCACAGTGGGTGGAGCCAATCCACTCCTTCTTCTATCATTCCCCTGCCACCTCCTTC  
CAGCACTGACTGGAAGGGAAGTTCAGGCTCTGAGACACACCCCAACATGCCTGCACCTGCAGCGCGCACACGCAC  
GCACACACACATACAGAGCTCTCTGAGGGTGATGGGGCTGAGCAGGAGGGGGGCTGGGTAAGAGCACAGGTTA  
GGGCATGGAAGGCTTCTCCGCCATTCTGACCCAGGGCCTAGGACGGATAGGCAGGAACATACAGACACATTTAC  
ACTAGAGGCCAGGGATAGAGGATATTGGGTCTCAGCCCTAGGGGAATGGGAAGCAGCTCAAGGGACCCTGGGT  
GGGAGCATAGGAGGGGTCTGGACATGTGGTACTAGTACAGGTTTTGCCCTGATTAATAAATCTCCAAAGCCCC  
AAATTCCTGTAGCCAGGTGGAGGCTTCTGATACGTGTATGAGACTATGCAAAGTACAAGGGCTGAGATTCTTC  
GTGTATAGCTGTGTGAACGTGTATGTACCTAGGATATGTTAAATGTATAGCTGGCACCTTAGTTGCATGACCACAT  
AGAACATGTGTCTATCTGCTTTTGCCTACGTGACAACACAAATTTGGGAGGGTGAGACACTGCACAGAAGACAGC  
AGCAAGTGTGCTGGCCTCTCTGACATATGCTAACCCCAAATACTCTGAATTTGGAGTCTGACTGTGCCAAGTGG  
GTCCAAGTGGCTGTGACATCTACGTATGGCTCCACACCTCCAATGCTGCCTGGGAGCCAGGGTGAGAGTCTGGGT  
CCAGGCCTGGCCATGTGGCCCTCCAGTGTATGAGAGGGCCCTGCCTGCTGCATCTTTTCTGTTGCCCCATCCACCG  
CCAGCTTCCCTTCACTCCCCTATCCCATTCTCCCTCTCAAGGCAGGGGTCATAGATCCTAAGCCATAAAATAAATTTT  
ATTCCAAAATAACAAAATAAATAATCTACTGTACACAATCTGAAAAGAAAGACGCTCTAAGTCTCAGATAGGTGC  
TGCGGTCCAGCCCCAGCTGGAGGAGACCCTGAGTCCAACCCAGGCCTCCCGAGGGGGCCAGTGAAGGGATCCC  
ACACCCACCGCCCTATGTAGGGCAGGGAAGAAATTGCAAAGGACTTGGGGGATAGATGGGAATGGGAGGGCA  
AACTGCAGCACTTGTTAAATTAATTAAGAAACAAACCAGAAGCACAAAAACGGGGAAGGAGAGGGGAGAAGG  
AGCAGGTCCAGTGTTCCAGGCCCCCAATTCTGGGGGCAAATGTTGCCACTTTTAGCTGGACCTTCCAGGGAAGT  
CCCCCTTTCCCTTGTCCAACTGAGTCCAAGTCTCACACCACTGGTGCAAACCTAAAGAGAATGGGAGTGTGT  
TGTGTGAGGGAGGGGAAAACCCCAAGATGCCCTGGAGGCAGAGTCCCTGCCCCCTCGCTCTGGGCAGGGGTGAGG  
GCACCACGCACCCTCCTTGTGTCTCTCTCCAGGCCTCTGCTTGTTATTGCTTGAAGCCCCACAGTCTTATGCCCATG  
GAGCAGGTGGGGAGGCAGGAGAAGGGCAGAGGAAGGATCCAGGGTTGTGACTAGATTCCGGGGATGGAGAGC  
GTGGGGGTCTGTGTGAGCCAGAAGTCTGAGGTCCTGGGTCTGAAGACACCAAGTCCAACCTCACTGCCGGCTGGC  
CTCAGCCTCACTTTACGCTGCTCCTGCGACCCTCCACCAGCGCGGGATGGGGTCTGGGGCAGGACATCTGTCC  
AGCAGCCCTTCTCGAACTCTGCAGGGAAAAGGGGGCAGTTAGGAGACTGCAGGGTGACTGGCTGCAGACAGAG  
GTGGTTGGGAACAGAAGCAGGGGGCAAAGAAAGCTGTGAAGATGGGCTCAGTTTAGGTTTATTGAATTACTGCCTC  
CTGCCACTGCATGTGTATGGGGGGTTCCATTCCCATGTGTGTGAGCCCCCTCCCTCCCTGGCTGTGCGTAGCTCT  
GTCTCTGTCTGTCTCTCTCTTTCTCTCCCGCTCCTCGGTTGGCCGGCCGAAGTTCCTATTCTCTAGAAAGTATAG  
GAACCTTACC GG GTAGGGGAGGCGCTTTTCCAAAGGCAGTCTGGAGCATGCGCTTtagcagccccgtgggcac  
TTGGCGCTACACAAGTGGCCTCTGGCCTCGCACATTTCCACATCCACCGGTAGGCGCCAACCGGCTCCGTTCTTT  
GGTGGCCCCCTTCGCGCCACCTTCTACTCCTCCCCTAGTCAGGAAGTCCCCCCCCGCCCCGAGCTCGCGTCGTGCAG  
GACGTGACAAATGGAAGTAGCACGTCTCACTAGTCTCGTGAGATGGACAGCACCGCTGAGCAATGGAAGCGGG  
TAGGCCTTTGGGGCAGCGCCAATAGCAGCTTTGCTCCTTCGCTTTCTGGGCTCAGAGGCTGGGAAGGGGTGGGT  
CCGGGGGCGGGCTCAGGGGCGGGCTCAGGGGCGGGGCGGGCGCCGAAGTCTCCGGAGGCCCGGCATTCTG  
CACGTTCAAAAGCGCACGTCTGCCGCGCTGTTCTCCTTCTCATCTCCGGGCTTTCGACCTGCATCCATCTAGA  
TCTCGATCGAGCAGCTGAAGCTTACCGCAGGCTATGAAAAAGCCTGAACCTACCGCGACGTCTGTGAGAAAGTTT  
CTGATCGAAAAGTTCGACAGCGTCTCCGACCTGATGCAGCTCTCGGAGGGCGAAGAATCTCGTGCTTTAGCTTCG  
ATGTAGGAGGGCGTGGATATGTCTGCGGGTAAATAGCTGCGCCGATGGTTTCTACAAAGATCGTTATGTTTATC  
GGCACTTTGCATCGGCCGCGTCCCGATTCCGGAAGTGCTTGACATTGGGGAATTCAGCGAGAGCCTGACCTATT  
GCATCTCCCGCGTGACAGGGTGTACGTTGCAAGACCTGCCTGAAACCGAACTGCCCGCTGTTCTGCAGCCGGT  
CGCGGAGGCCATGGATGCGATCGCTGCGGCCGATCTTAGCCAGACGAGCGGGTTGGGCCATTGCGACCGCAAG  
GAATCGGTCAATACTACATGGCGTGATTTATATGCGCGATTGCTGATCCCCATGTGTATCACTGGCAAAGTGT  
GATGGACGACACCGTCAGTGCGTCCGTGCGCAGGCTCTCGATGAGCTGATGCTTTGGGCCGAGGACTGCCCCGA  
AGTCCGGCACCTCGTGACGCGGATTTGGGCTCCAACAATGTCTGACGGACAATGGCCGCATAACAGCGGTGAT  
TGAAGTGGAGCGAGGCGATGTTGCGGGATTCCAATACGAGGTCGCAACATCTTCTTGGAGGCCGTGGTTGGC

TTGTATGGAGCAGCAGACGCGCTACTTCGAGCGGAGGCATCCGGAGCTTGCAGGATCGCCGCGGCTCCGGGCGT  
ATATGCTCCGCATTGGTCTTGACCAACTCTATCAGAGCTTGTTGACGGCAATTCGATGATGCAGCTTGGGCGCA  
GGGTCGATGCGACGCAATCGTCCGATCCGGAGCCGGGACTGTCGGGCGTACACAAATCGCCGAGAAAGCGCGG  
CCGTCTGGACCGATGGCTGTGTAGAAGTACTCGCCGATAGTGAAACCGACGCCCCAGCACTCGTCCGAGGGCAA  
AGGAATAGGGGAGGCTAACTGAAGCTTCCCGGGGTACCAAATTCGTCGACAGATCTAACTGTTTATTGCAGCT  
TATAATGGTTACAAATAAAGCAATAGCATCACAAATTCACAAATAAAGCATTTTTTCTACTGCATTCTAGTTGTGG  
TTTGTCCAAACTCATCAATGTATCTTATGATGTCTGCATATGGAAGTTCCTATTCTCTAGAAAAGTATAGGAACTTCG  
CGGCCGCGCTGCCAGTTCAGCTCACGCTTGTAAGTGGCTCCGAAAGCCTCATCCTTGGGCTTCTTGGGATAGAGA  
TTTTTGAGCTGAGCAAGATCCCGGATTCGGTCCCCAGTGAGCGAATGGACAGGTCTTGGCAGAGAATGGCTGG  
ATGTTCTCTATCTGTGGAGAGCCTATGGTAGGAAGGAGACCCTGAGATCCCTCTGTCCGGACTTCTTCCCCTTCCC  
CAACCCCTACCATAAGACCTGTTCTCACTCCACCAAGGCAAGGGAGAGAGGACCTAGGGTGGGGCTCCTGAGGGA  
GAGAGACCCACTAGTCTCCGTTCCACAGAGCTCACAGTGAGAAGGTGAACATTTAGACCACAGAAGGAAGAAG  
AGAAGCTGGAAGAACTTCTGAAGATCAGGATCGGCATCAGGAAGGTCAGGACATTTTATTCCAGAAAGAAACCC  
CAGAGGGCACAGGCACAGAGACAGAGGACTGGCTGGGGTGGCCTCACCATCCTGGCCCCGATGACATGGGCAA  
TGGTGATGCCCCAATCTCTGAGTCGCTGAAGCGGAGGAGAAAGGTTCCGTCGGGCTCATTGAGAAGAAGGCTA  
GTAACGTACTGTTTGCTGATGAAGCCAATGATCAGCCTGGCCGGGATGAAGGAGAGGATGGGGCATGGGCAGTG  
AGTATGGAGGTGACTGGTGTATGGCTGCTCAGACTACCCAGGGTGGGGACTCACCGGTCAGACCAGTAGCTCCG  
GAGACAGCGTTTGGTGAGGTCCAGGACACCATCAAACCACTGCCAAAAGGTGAAGCCACGGCCAGCAGGATCT  
CCTAGGGGGAGAGGGGGAAAGGTGTGAGCCGAGGGAGGGCCAGAGCTGGAGCCTGTTTAGGGCAGGCAGTGA  
GCTGTGAGTGCCCGTGCCCAATGCCCTGGCTCACAAATACCACTGAGATCTTTTCCCTCTGCCAAAATTATGGG  
GACATCATGAAGCCCTTGAGCATCTGACTTCTGGCTAATAAAGGAAATTTATTTTATTGCAATAGTGTGTTGGA  
TTTTTGTGTCTCTCACTCGGAAGGACATATGGGAGGGCAAATCATTTAAAACATCAGAATGAGTATTTGGTTTAG  
AGTTTGGCAACATATGCCATATGCTGGCTGCCATGAACAAAGGTGGCTATAAAGAGGTCATCAGTATATGAAACA  
GCCCCCTGCTGTCCATTCTTATTCCATAGAAAAGCCTTGACTTGAGGTTAGATTTTTTTTATATTTTGTGTTA  
TTTTTTCTTTAACATCCCTAAAATTTTCTTACATGTTTTACTAGCCAGATTTTTCTCCTCTCCTGACTACTCCAGT  
CATAGCTGTCCCTCTTCTTATGAAGATCCCTCGACCTGCAGCCCAAGCTTGGCGTAATCATGGTCATAGCTGTTT  
CCTGTGTGAAATTGTTATCCGCTCACAATTCACACAACATACGAGCCGGAAGCATAAAGTGAAAGCCTGGGGTG  
CCTAATGAGTGAGCTAACTCACATTAATTGCGTTGCGCTCACTGCCCCGCTTTCAGTCGGGAAACCTGTCGTGCCA  
GCGGATCCGCATCTCAATTAGTCAGCAACCATAGTCCCGCCCCCTAACTCCGCCCATCCCGCCCCCTAACTCCGCCAG  
TTCCGCCCATCTCCGCCCCATGGCTGACTAATTTTTTTTATTTATGCAGAGGCCGAGGCCGCTCGGCCTCTGAGC  
TATCCAGAAAGTAGTGAGGAGGCTTTTTTGGAGGCCTAGGCTTTTGCAAAAAGCTAACTTGTTTATTGCAGCTTAT  
AATGGTTACAAATAAAGCAATAGCATCACAAATTCACAAATAAAGCATTTTTTCTACTGCATTCTAGTTGTGGTTT  
GTCCAAACTCATCAATGTATCTTATCATGTCTGGATCCGCTGCATTAATGAATCGGCCAACGCGCGGGGAGAGGCG  
GTTTGCATATTGGGCGCTCTTCCGCTTCTCGCTCACTGACTCGCTGCGCTCGGTCGTTCCGGCTGCGGCGAGCGGT  
ATCAGCTCACTCAAAGGCGGTAATACGGTTATCCACAGAATCAGGGGATAACGCAGGAAAGAACATGTGAGCAA  
AAGGCCAGCAAAAAGGCCAGGAACCGTAAAAAGGCCGCGTTGCTGGCGTTTTTCCATAGGCTCCGCCCCCTGACG  
AGCATCACAAAATCGACGCTCAAGTCAGAGGTGGCGAAACCCGACAGGACTATAAAGATACCAGGCGTTTCCCC  
CTGGAAGCTCCCTCGTGCCTCTCCTGTTCCGACCCTGCCGCTTACCGGATACCTGTCCGCCTTCTCCCTTCGGGA  
AGCGTGGCGCTTTCTCAATGCTCACGCTGTAGGTATCTCAGTTCGGGTGATAGGTCGTTTCGCTCCAAGCTGGGCTGTG  
TGCACGAACCCCCGTTAGCCCCGACCGCTGCGCCTTATCCGGTAACTATCGTCTTGAGTCCAACCCGGTAAGACA  
CGACTTATCGCCACTGGCAGCAGCCACTGGTAACAGGATTAGCAGAGCGAGGTATGTAGGCGGTGCTACAGAGTT  
CTTGAAGTGGTGGCCTAACTACGGCTACACTAGAAGGACAGTATTTGGTATCTGCGCTCTGCTGAAGCCAGTTACC  
TTCGAAAAAGAGTTGGTAGCTCTTGATCCGGCAAACAAACCACCGCTGGTAGCGGTGGTTTTTTTGTGTTGCAAGC  
AGCAGATTACGCGCAGAAAAAAGGATCTCAAGAAGATCCTTTGATCTTTTCTACGGGGTCTGACGCTCAGTGGA  
ACGAAAACTCACGTTAAGGGATTTTGGTCATGAGATTATCAAAAAGGATCTTCACCTAGATCCTTTAAATTAATAA  
TGAAGTTTTAAATCAATCTAAAGTATATATGAGTAAACTTGGTCTGACAGTTACCAATGCTTAATCAGTGAGGCAC  
CTATCTCAGCGATCTGTCTATTTTCGTTTCATCCATAGTTGCCTGACTCCCCGCTCGTGTAGATAACTACGATACGGGAG  
GGCTTACCATCTGGCCCCAGTGCTGCAATGATACCGCGAGACCCACGCTACCGGCTCCAGATTTATCAGCAATAA

ACCAGCCAGCCGGAAGGGCCGAGCGCAGAAGTGGTCCTGCAACTTTATCCGCCTCCATCCAGTCTATTAATTGTTG  
CCGGGAAGCTAGAGTAAGTAGTTCGCCAGTTAATAGTTTGCGCAACGTTGTTGCCATTGCTACAGGCATCGTGGT  
GTCACGCTCGTCGTTTGGTATGGCTTCATTAGCTCCGGTTCCCAACGATCAAGGCGAGTTACATGATCCCCATGT  
TGTGCAAAAAAGCGGTTAGCTCCTTCGGTCCTCCGATCGTTGTCAGAAGTAAGTTGGCCGCGAGTGTATCACTCAT  
GGTTATGGCAGCACTGCATAATTCTTACTGTCATGCCATCCGTAAGATGCTTTTCTGTGACTGGTGAGTACTCAA  
CCAAGTCATTCTGAGAATAGTGTATGCGGCGACCGAGTTGCTCTTGCCCGGCGTCAATACGGGATAATACCGCGC  
CACATAGCAGAACTTTAAAAGTGCTCATCATTGAAAAACGTTCTTCGGGGCGAAAACTCTCAAGGATCTTACCGCT  
GTTGAGATCCAGTTCGATGTAACCCACTCGTGCACCCAACTGATCTTCAGCATCTTTTACTTTCACCAGCGTTTCTGG  
GTGAGCAAAAACAGGAAGGCAAAATGCCGCAAAAAAGGGAATAAGGGCGACACGGAAATGTTGAATACTCATAC  
TCTTCCTTTTCAATATTATTGAAGCATTTATCAGGGTTATTGTCTCATGAGCGGATACATATTTGAATGTATTTAGA  
AAAATAAACAAATAGGGGTTCCGCGCACATTTCCCCGAAAAGTGCCACCTGG

Blue: left homologous arm

Auburn: knock-in sequence

Red: FRT (flippase recognition target) site

Purple: PGK1-Hygromycin resistance gene

Green: right homologous arm

**PCMV-CasRx-U6-sgRNA.NAB2STAT6 sequence:**

ATTTTGTGATGCTCGTCAGGGGGGCGGAGCCTATGGAAAAACGCCAGCAACGCGGCCTTTTACGGTTCCTGGC  
CTTTTGTGCTTTTGTCTACATGTCTGCAGGCAGCTGCGCGCTCGCTCGCTCACTGAGGCCGCGCGGCGTCCG  
GGCGACCTTTGGTCGCCCCGCTCAGTGAGCGAGCGAGCGCGCAGAGAGGGAGTGGCCAACTCCATCACTAGGG  
GTTCTCGCGCCTCTAGATAGTTATTAATAGTAATCAATTACGGGGTCATTAGTTCATAGCCCATATATGGAGTTC  
GCGTTACATAACTTACGGTAAATGGCCCGCTGGCTGACCGCCCAACGACCCCGCCATTGACGTCAATAATGAC  
GTATGTTCCCATAGTAACGCCAATAGGGACTTTCCATTGACGTCAATGGGTGGAGTATTACGGTAAACTGCCAC  
TTGGCAGTACATCAAGTGTATCATATGCCAAGTACGCCCCCTATTGACGTCAATGACGGTAAATGGCCCGCTGGC  
ATTATGCCCAGTACATGACCTTATGGGACTTTCTACTTGGCAGTACATCTACGTATTAGTCATCGCTATTACCATG  
GTGATGCGGTTTTGGCAGTACATCAATGGGCGTGGATAGCGGTTTGACTCACGGGGATTTCGAAGTCTCCACCCCA  
TTGACGTCAATGGGAGTTTGTGTTGGCACCAAATCAACGGGACTTTCCAAATGTCGTAACAACTCCGCCCCATT  
GACGCAAATGGGCGGTAGGCGTGTACGGTGGGAGGTCTATATAAGCAGAGCTGGTTTAGTGAACCGTCAGATCC  
GCTAGCGCTACCGGTCCACCGGTGCCACCATGCTAAAAAGAAAAGAAAGGTGGGTTCTGGTATCGAGAAGAAG  
AAGAGCTTCGCCAAGGGCATGGGAGTGAAGAGCACCTGGTGTCCGGCTCTAAGGTGTACATGACCACATTTGCT  
GAGGGAAGCGACGCCAGGCTGGAGAAGATCGTGGAGGGCGATAGCATCAGATCCGTGAACGAGGGAGAGGCTT  
TCAGCGCCGAGATGGCTGACAAGAACGCTGGCTACAAGATCGGAAACGCCAAGTTTTCCACCCAAAGGGCTACG  
CCGTGGTGGCTAACAACTGTACACCGGACCAAGTGCAGCAGGACATGCTGGGACTGAAGGAGACACTGGAG  
AAGAGGTACTTCGGCGAGTCCGCCGACGGAACGATAACATCTGCATCCAGGTCTCCACAACATCCTGGATATC  
GAGAAGATCCTGGCTGAGTACATCACAACGCCGCTTACGCCGTGAACAACATCTCCGGCCTGGACAAGGATATC  
ATCGGCTTCGGAAGTTTTCTACCGTGTACACATACGACGAGTTCAAGGATCCAGAGCACCACGGGCGCTTTTA  
ACAACAACGACAAGCTGATCAACGCCATCAAGGCTCAGTACGACGAGTTTCGATAACTTTCTGGATAACCCAGGCT  
GGGCTACTTCGGACAGGCTTTCTTTCTAAGGAGGGCAGAACTACATCATCACTACGGAACGAGTGTTACGA  
CATCCTGGCCCTGCTGAGCGGACTGAGGCACTGGGTGGTGCACAACAACGAGGAGGAGTCTCGGATCAGCCGCA  
CCTGGCTGTACAACCTGGACAAGAACCTGGATAACGAGTACATCTCCACACTGAACTACCTGTACGACAGGATCAC  
CAACGAGCTGACAAACAGCTTCTCCAAGAAGCTGCGGCTAACGTGAACTACATCGCTGAGACCCTGGGCATCAAC  
CCAGCTGAGTTGCTGAGCAGTACTTCAGATTTTCCATCATGAAGGAGCAGAAGAAGCTGGGCTTCAACATCACA  
AGCTGAGAGAAGTGATGCTGGACAGAAAGGATATGTCCGAGATCAGGAAGAACCACAAGGTGTTGATTCTATC  
AGAACCAAGGTGTACACAATGATGGACTTTGTGATCTACAGGTAATACATCGAGGAGGATGCCAAGGTGGCCGCT  
GCCAACAAGAGCCTGCCCCGACAACGAGAAGTCTCTGAGCGAGAAGGATATCTTCGTGATCAACCTGAGAGGCTCC  
TTTAACGACGATCAGAAGGACGCTCTGTACTACGATGAGGCCAACAGGATCTGGAGAAAGCTGGAGAACATCATG  
CACAACATCAAGGAGTTCCGGGGAAACAAGACCCGCGAGTACAAGAAGAAGGACGCTCCAAGGCTGCCTAGGAT  
CCTGCCTGCTGGAAGGGACGTGAGCGCCTTCAGCAAGCTGATGTACGCCCTGACAATGTTTCTGGACGGAAGGA  
GATCAACGATCTGCTGACCACACTGATCAACAAGTTCGACAACATCCAGTCTTTCTGAAAGTGATGCCTCTGATCG  
GCGTGAACGCTAAGTTCGTGGAGGAGTACGCCTCTTTAAGGACAGCGCCAAGATCGCTGATGAGCTGCGGCTGA  
TCAAGTCCTTTGCCAGGATGGGAGAGCCAATCGCTGACGCTAGGAGAGCTATGTACATCGATGCCATCCGGATCC  
TGGAACCAACCTGTCTTACGACGAGCTGAAGGCTCTGGCCGACACCTTCAGCCTGGATGAGAACGGCAACAAGC  
TGAAGAAGGGCAAGCACGGAATGCGCAACTTCATCATCAACAACGTGATCAGCAACAAGCGGTTTCACTACCTGA  
TCAGATACGGCGACCCAGCTCACCTGCACGAGATCGCTAAGAACGAGGCCGTGGTGAAGTTCGTGCTGGGACGG  
ATCGCCGATATCCAGAAGAAGCAGGGCCAGAACGGAAGAACCAGATCGACCGCTACTACGAGACCTGCATCGG  
CAAGGATAAGGGAAAGTCCGTGTCTGAGAAGGTGGACGCTCTGACCAAGATCATCACAGGCATGAACTACGACC  
AGTTCGATAAGAAGAGATCTGTGATCGAGGACACCGGAAGGGAGAACGCCGAGAGAGAGAAGTTTAAGAAGAT  
CATCAGCCTGTACCTGACAGTGATCTACCACATCCTGAAGAACATCGTGAACATCAACGCTAGATACGTGATCGGC  
TTCCACTGCGTGGAGCGGATGCCAGCTGTACAAGGAGAAGGGATACGACATCAACCTGAAGAAGCTGGAGGA  
GAAGGGCTTTAGCTCCGTGACCAAGCTGTGCGCTGGAATCGACGAGACAGCCCCGACAAGAGGAAGGATGTGG  
AGAAGGAGATGGCCGAGAGAGCTAAGGAGAGCATCGACTCCCTGGAGTCTGCTAACCTAAGCTGTACGCCAAC  
TACATCAAGTACTCCGATGAGAAGAAGGCCGAGGAGTTCACAGGCAGATCAACAGAGAGAAGGCCAAGACCGC  
TCTGAACGCCTACCTGAGGAACACAAAGTGAACGTGATCATCCGGGAGGACCTGCTGCGCATCGATAACAAGAC  
CTGTACACTGTTCCGGAACAAGGCTGTGCACCTGGAGGTGGCTCGCTACGTGCACGCCTACATCAACGACATCGCC

GAGGTGAACTCCTACTTTTCAGCTGTACCACTACATCATGCAGAGGATCATCATGAACGAGAGATACGAGAAGTCTA  
GCGGCAAGGTGTCTGAGTACTTCGACGCCGTGAACGATGAGAAGAAGTACAACGATAGACTGCTGAAGCTGCTG  
TGCGTGCCTTTCGGATACTGTATCCACGGTTTAAGAACCTGAGCATCGAGGCCCTGTTTCGACCGCAACGAGGCTG  
CCAAGTTTGATAAGGAGAAGAAGAAGGTGAGCGGCAACTCCGGTCTGGTCCAAAGAAAGCGCAAGGTGGCG  
GCCGCTGATTACAAAGACGATGACGATAAGTAAAGATCCTAAACTTGTATTATGCAGCTTATAATGGTTACAAAT  
AAAGCAATAGCATCACAAATTTACAAATAAAGCATTTTTTTCTACTGCATTCTAGTTGTGGTTTGTCCAAACTCATCA  
ATGTATCTTATCATGTCTGGATCGCGGCCGAGGGCTATTTCCCATGATTCTTCATATTTGCATATACGATACAAG  
GCTGTTAGAGAGATAATTGGAATTAATTTGACTGTAAACACAAAGATATTAGTACAAAATACGTGACGTAGAAAG  
TAATAATTTCTTGGGTAGTTTGCAGTTTAAATTTATGTTTTAAATGGACTATCATATGCTTACCGTAACCTGAAAG  
TATTTTCGATTTCTTGGCTTTATATATCTTGTGGAAAGGACGAAACACCGCAAGTAAACCCCTACCAACTGGTCGGG  
GTTTGAAACTACCCATCTGTTTCAGCTGCGAGAGGTGGCTCAAGTAAACCCCTACCAACTGGTCGGGGTTTGAAACT  
TTTTTTGAATTCTGATGCGGTGGCGGCCGAGGAACCCCTAGTGATGGAGTTGGCCACTCCCTCTCTGCGCGCTCG  
CTCGCTCACTGAGGCCGGGCGACCAAAGGTGCGCCGACGCGCGGCTTTGCCCGGGCGGCTCAGTGAGCGAGC  
GAGCGCGCAGCTGCCTGCAGGGCGCCTGATGCGGTATTTCTCCTTACGCATCTGTGCGGTATTTACACCCGCAT  
ACGTCAAAGCAACCATAGTACGCGCCCTGTAGCGGCGCATTAAGCGCGCGGGTGTGGTGGTTACGCGCAGCGT  
GACCGCTACACTTGCCAGCGCCTTAGCGCCGCTCCTTCGCTTCTTCCCTTCTTCTCGCCACGTTCCGCGGCTT  
TCCCCGTCAAGCTCTAAATCGGGGGCTCCCTTAGGGTCCGATTTAGTGCTTTACGGCACCTCGACCCCAAAAAAC  
TTGATTTGGGTGATGGTTCACGTAGTGGGCCATCGCCCTGATAGACGGTTTTTCGCCCTTTGACGTTGGAGTCCAC  
GTTCTTTAATAGTGGACTCTTGTTCCAACTGGAACAACACTCAACTCTATCTCGGGCTATTCTTTTGATTTATAAGG  
GATTTTGCCGATTTCCGTCTATTGGTTAAAAATGAGCTGATTTAACAAAAATTTAACGCGAATTTTAACAAAATAT  
TAACGTTTACAATTTTATGGTGCATCTCAGTACAATCTGCTCTGATGCCGCATAGTTAAGCCAGCCCCGACACCCG  
CCAACACCCGCTGACGCGCCCTGACGGGCTGTCTGCTCCCGGCATCCGCTTACAGACAAGCTGTGACCGTCTCCG  
GGAGCTGCATGTGTGAGAGGTTTTACCGTCATCACCGAAACGCGCGAGACGAAAGGGCCTCGTGATACGCCTAT  
TTTTATAGGTTAATGTCATGATAATAATGGTTTTCTAGACGTCAGGTGGCACTTTTCGGGGAAATGTGCGCGGAAC  
CCCTATTTGTTTATTTTCTAAATACATTCAAATATGTATCCGCTCATGAGACAATAACCCTGATAAATGCTTCAATA  
ATATTGAAAAAGGAAGAGTATGAGTATTCAACATTTCCGTGTCGCCCTTATCCCTTTTTTGCGGCATTTTGCTTCC  
TGTTTTTGCTCACCCAGAAACGCTGGTGAAAGTAAAAGATGCTGAAGATCAGTTGGGTGCACGAGTGGGTACAT  
CGAACTGGATCTCAACAGCGGTAAGATCCTTGAGAGTTTTCGCCCCGAAGAACGTTTTCCAATGATGAGCACTTTT  
AAAGTTCTGCTATGTGGCGCGGTATTATCCCGTATTGACGCCGGGCAAGAGCAACTCGGTCGCCGCATACACTATT  
CTCAGAATGACTTGTTGAGTACTACCAAGTCACAGAAAAGCATCTTACGGATGGCATGACAGTAAGAGAATTAT  
GCAGTGCTGCCATAACCATGAGTGATAACACTGCGGCCAACTTACTTCTGACAACGATCGGAGGACCGAAGGAGC  
TAACCGCTTTTTTGACAACATGGGGGATCATGTAACCTGCCTTGATCGTTGGGAACCGGAGCTGAATGAAGCCAT  
ACCAAACGACGAGCGTGACACCACGATGCCTGTAGCAATGGCAACAACGTTGCGCAAACCTATTAACCTGGCGAACT  
ACTTACTCTAGCTTCCCGGCAACAATTAATAGACTGGATGGAGGCGGATAAAGTTGCAGGACCACTTCTGCGCTCG  
GCCCTCCGGCTGGCTGGTTTATTGCTGATAAATCTGGAGCCGGTGAGCGTGGAAGCCGCGGTATCATTGCAGCA  
CTGGGGCCAGATGGTAAGCCCTCCCGTATCGTAGTTATCTACACGACGGGGAGTCAGGCAACTATGGATGAACGA  
AATAGACAGATCGCTGAGATAGGTGCCTCACTGATTAAGCATTGGTAACTGTGAGACCAAGTTTACTCATATATAC  
TTAGATTGATTTAAACTTCATTTTTAATTTAAAGGATCTAGGTGAAGATCCTTTTTGATAATCTCATGACCAAAA  
TCCCTTAACGTGAGTTTTCGTTCCACTGAGCGTCAGACCCCGTAGAAAAAGATCAAAGGATCTTCTTGAGATCCTTTT  
TTTCTGCGCGTAATCTGCTGCTTGCAAACAAAAAAACCACCGCTACCAGCGGTGGTTTGTGCGGGATCAAGAGC  
TACCAACTCTTTTTCCGAAGGTAACCTGGCTTCAGCAGAGCGCAGATACCAAATACTGTTCTTCTAGTGAGCCGTAG  
TTAGGCCACCACTTCAAGAACTCTGTAGCACCGCCTACATACCTCGCTCTGCTAATCCTGTTACCAAGTGGCTGCTGC  
CAGTGGCGATAAGTCGTGTCTTACCGGGTTGGACTCAAGACGATAGTTACCGGATAAGGCGCAGCGGTGCGGCT  
GAACGGGGGGTTCGTGCACACAGCCAGCTTGGAGCGAACGACCTACACCGAACTGAGATACCTACAGCGTGAG  
CTATGAGAAAGCGCCACGCTTCCCGAAGGGAGAAAGGCGGACAGGTATCCGGTAAGCGGCAGGGTCCGAACAG  
GAGAGCGCACGAGGGAGCTTCCAGGGGGAAACGCCTGGTATCTTTATAGTCCTGTGCGGTTTCGCCACCTCTGAC  
TTGAGCGTCG

Red: AAV2 ITR

Green: CMV promoter

Purple: SV40 NLS

Auburn: CasRx

Orange: U6 promoter

Yellow: sgRNA.NAB2STAT6

## Supplementary Figure S1

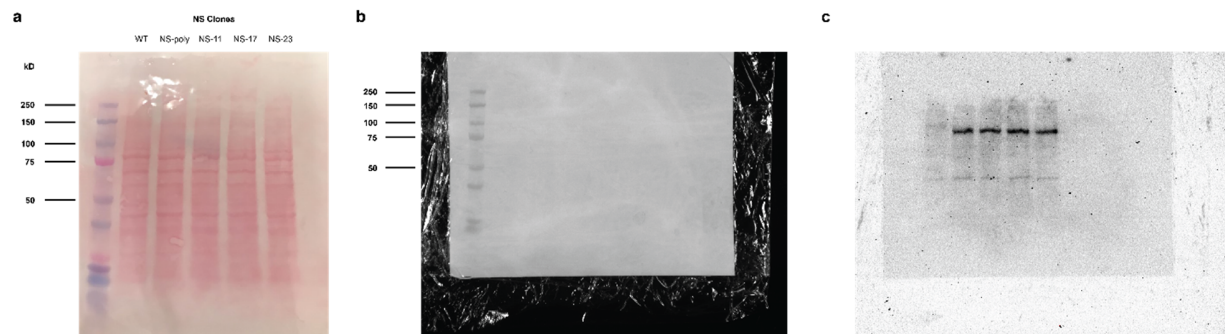

**Supplementary Figure S1. Original data for Western blot. (a)** Ponceau staining of the whole cell lysates prepared from HCT116 wild type and NAB2-STAT6 fusion cell lines. **(b)** Full Western blot image (bright field). **(c)** Full Western blot image (chemiluminescence).

Supplementary Figure S2

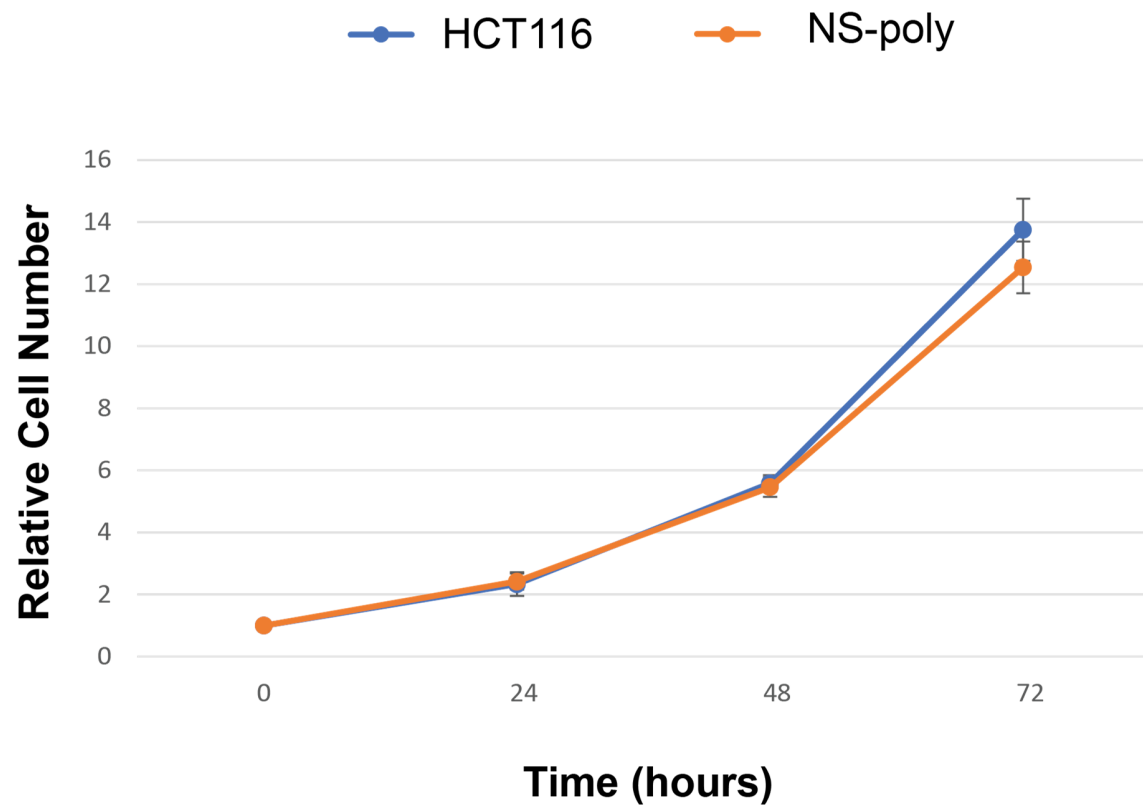

**Supplementary Figure S2. Cell proliferation assays for wild type HCT116 and NS-poly cells.** No significantly different proliferation rate was observed between wild type HCT116 and NS-poly cells.

# Supplementary Figure S3

**a**

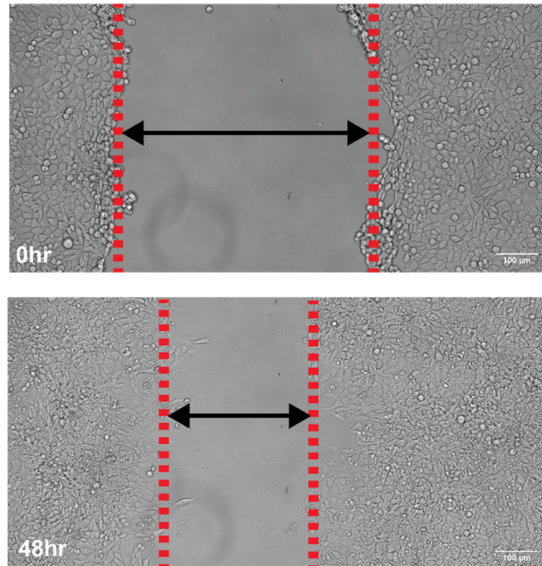

**b**

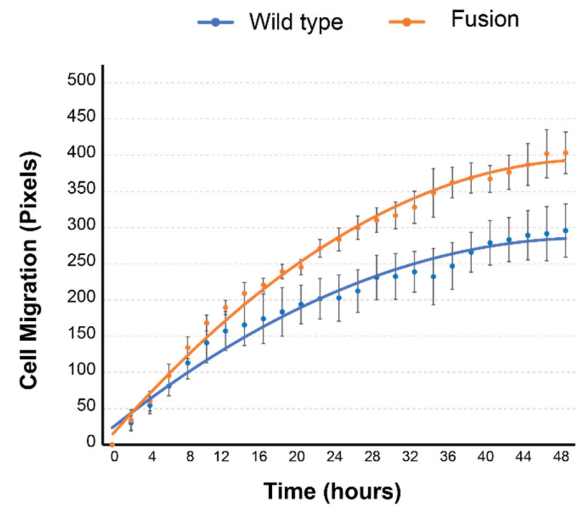

**Supplementary Figure S3. *In vitro* characterization of NS-poly cell model. (a)** Representative wound healing assay images for wild type HCT116 cells at 0 and 48 hours. **(b)** Wound healing assay results for both wild type HCT116 and NS-poly cells. The NS-poly cells showed higher motility rate compared to wild type HCT116.

**Supplementary Table S1: Summary sequencing statistics of the RNA-seq assay.**

**Supplementary Table S2: Primers used in this study.**

**Supplementary Table S3: Wound healing assays using HCT116 and NS-poly cells.**

**Supplementary Table S4: Differentially expressed genes between wild type HCT116 and NAB2-STAT6 fusion cells from RNA-seq.** Negative values in the log2FoldChange reflected fold changes observed in the control samples (HCT116 parental cells) compared to experimental samples (our engineered NAB2-STAT6 fusion cells). Therefore, negative values indicated that expression levels of such genes were elevated in the engineered NAB2-STAT6 fusion cells.

**Supplementary Table S5: Differentially expressed genes used for PANTHER signaling pathway analysis.**

**Supplementary Table S6: NAB2-STAT6 fusion-related signaling pathways identified by the PANTHER classification system.**

**Supplementary Table S7: NAB2-STAT6 fusion-specific ASOs with 2'-O-methoxyethyl modifications.**

**prepDE.py:** The python script used to quantify both expressed genes and transcripts.

**DESeq2.r:** The R script used to identify differentially expressed genes and prepare for the corresponding heatmap.
